# Supplementary material
Source: PubMed Central journal article supplement (PMC8328528)
Supplement: mmc1.pdf [file mmc1.pdf]

**Supplemental Table 1.** Comprehensive overview of published COVID-19 kidney biopsy findings.

| Author           | N  | Mean Age (years)   | Sex        | Race                                   | Creatinine mg/dL                                          | Proteinuria           | Hematuria | Presentation                               | Diagnosis                                                                                                                                                                                                                                | Conclusions and Patient Outcomes                                               | Reference |
|------------------|----|--------------------|------------|----------------------------------------|-----------------------------------------------------------|-----------------------|-----------|--------------------------------------------|------------------------------------------------------------------------------------------------------------------------------------------------------------------------------------------------------------------------------------------|--------------------------------------------------------------------------------|-----------|
| Sharma et al     | 10 | 65 (range: 45-77 ) | 5 M / 5 F  | 5 Black, 3 Hispanic, 2 White           | N/A                                                       | 9/10                  | 6/10      | AKI                                        | 5/10 ATN<br>1/10 ATI with myoglobin casts,<br>2/10 Thrombotic microangiopathy<br>1/10 Crescentic glomerulonephritis<br>1/10 Collapsing glomerulopathy                                                                                    | 5/10 Death<br>2/10 Dialysis dependent<br>3/10 Improvement of kidney function   | 7         |
| Jhaveri et al    | 1  | 69                 | F          | White                                  | Dialysis                                                  | Yes                   | Yes       | AKI                                        | Thrombotic microangiopathy                                                                                                                                                                                                               | Death                                                                          | 25        |
| Kissling et al   | 1  | 63                 | M          | Black                                  | 4.07                                                      | Yes                   | N/A       | AKI, oliguria<br>Sub-nephrotic proteinuria | Acute tubular necrosis                                                                                                                                                                                                                   | Persistent renal dysfunction                                                   | 37        |
| Kudose et al     | 17 | 49.9               | 12 M / 5 F | 12 Black, 3 White, 1 Hispanic, 1 Asian | Elevated in 16/17<br>Average: 7.31<br>Range: (0.8 - 11.6) | 4/17                  | 6/6       | AKI: 15 patients<br>CKD: 5 patients        | 5/17 Collapsing glomerulopathy<br>1/17 Minimal change disease<br>2/17 Membranous nephropathy<br>1/17 Lupus nephritis<br>1/17 Anti-GBM disease<br>5/17 Acute tubular injury<br>1/17 T cell-mediated rejection<br>1/17 Cortical infarction | 1/17 Death<br>9/17 Dialysis<br>5/17 Recovery of renal function<br>2/17 Unknown | 8         |
| Larsen et al     | 1  | 44                 | F          | Black                                  | 11.4                                                      | Yes                   | Yes       | AKI superimposed on known CKD.             | Collapsing glomerulopathy                                                                                                                                                                                                                | Dialysis                                                                       | 32        |
| Magoon et al     | 2  | 42 (28; 56)        | 1 M / 1 F  | 2 Black                                | Elevated in both patients (6.5; 7.72)                     | Yes                   | N/A       | AKI, proteinuria<br>1/2 concurrent CKD     | 2/2 Collapsing glomerulopathy                                                                                                                                                                                                            | 2/2 Dialysis                                                                   | 33        |
| Moeinzadeh et al | 1  | 25                 | M          | Iranian                                | Elevated (5.5)                                            | Yes (2.9 g/24 h)      | N/A       | AKI                                        | Crescentic glomerulonephritis                                                                                                                                                                                                            | Persistent renal dysfunction                                                   | 51        |
| Noble et al      | 2  | 49.5 (54; 45)      | 2/2 M      | 2Black                                 | Elevated (13.58; 14.03)                                   | Yes                   | 1 / 2     | AKI on CKD                                 | 2/2 Collapsing glomerulopathy (1 native, 1 allograft)                                                                                                                                                                                    | Dialysis dependent                                                             | 34        |
| Peleg et al      | 1  | 46                 | M          | Black                                  | Elevated (16.6)                                           | Yes (Nephrotic range) | No        | AKI                                        | Collapsing glomerulopathy                                                                                                                                                                                                                | Dialysis dependent                                                             | 35        |

|                                     |     |                           |              |                                    |                                                                     |                             |      |                                                             |                                                                                                                                                                                                                       |                                                                               |    |
|-------------------------------------|-----|---------------------------|--------------|------------------------------------|---------------------------------------------------------------------|-----------------------------|------|-------------------------------------------------------------|-----------------------------------------------------------------------------------------------------------------------------------------------------------------------------------------------------------------------|-------------------------------------------------------------------------------|----|
| Akilesh et al                       | 17* | 53.6<br>(range:<br>34-77) | 8 M, 9<br>F  | 8 Black, 5<br>Hispanic, 4<br>White | Elevated in<br>16/17<br>Average:<br>6.08<br>Range: (0.7<br>to 11.9) | 11/17                       | 4/17 | 15/17 AKI<br>11/17 Proteinuria                              | 7/17 Collapsing glomerulopathy<br>1/17 FSGS – non-collapsing<br>2/17 TMA<br>1/17 Minimal change disease<br>1/17 Diabetic nephropathy<br>1/17 Post-infectious GN<br>2/17 ATN alone<br>2/17 Antibody-mediated rejection | 8/17 Dialysis dependent<br>9/17 Improvement in renal function                 | 9  |
| Rossi et al                         | 1   | 49                        | M            | N/A                                | N/A                                                                 | N/A                         | N/A  | AKI                                                         | ATI                                                                                                                                                                                                                   | Improvement in renal function                                                 | 10 |
| Sharma et al                        | 2   | 58<br>(67: 49)            | 1 M/ 1<br>F  | 2 Black                            | Elevated<br>(8.27; 10.0)                                            | 2/2                         | 1/2  | AKI, proteinuria                                            | 2/2 Collapsing glomerulopathy                                                                                                                                                                                         | 2/2 Dialysis dependent                                                        | 30 |
| Uppal et al                         | 2   | 55<br>(64; 46)            | 2 M          | 1 Black; 1<br>South Asian          | Elevated<br>(7.9; 4.0)                                              | 1/2                         | 1/2  | 2/2 AKI                                                     | 2/2 Crescentic glomerulonephritis                                                                                                                                                                                     | 2/2 Improvement in renal function                                             | 52 |
| Wu et al                            | 6   | 54.8                      | 4 M/ 2<br>F  | 6/6 Black                          | Elevated<br>6.5<br>Range: (2.9<br>to 11.4)                          | 6/6                         | 4/6  | 6/6 AKI;<br>Nephrotic-range<br>proteinuria;<br>3/6 with CKD | 6/6 Collapsing glomerulopathy                                                                                                                                                                                         | 2/6 Death<br>3/6 Dialysis-dependent<br>1/6 Recovery of renal function         | 31 |
| Hale et al<br>(abstract)            | 1   | 56                        | M            | Black                              | Elevated<br>(5)                                                     | Yes (15 g/day)              | N/A  | AKI with oliguria                                           | Collapsing glomerulopathy                                                                                                                                                                                             | Dialysis dependent                                                            | S1 |
| Song et al<br>(abstract)            | 1   | 74                        | F            | N/A                                | Elevated<br>(10.2)                                                  | Yes (4 g/day)               | Yes  | AKI                                                         | Pauci-immune crescentic<br>glomerulonephritis, ANCA-<br>associated                                                                                                                                                    | Dialysis dependent                                                            | S2 |
| Tran et al<br>(abstract)            | 10  | Range<br>25-63            | N/A          | N/A                                | Elevated<br>(Range: 1.2<br>to 13.5)                                 | N/A                         | N/A  | AKI                                                         | 10/10 ATI, reported 'viral particles'<br>by EM                                                                                                                                                                        | 4/10 Dialysis dependent                                                       | S3 |
| Flores-Chang<br>et al<br>(abstract) | 1   | 69                        | F            | White                              | N/A                                                                 | Yes                         | Yes  | AKI + microangiopathic<br>hemolytic anemia                  | TMA with cortical necrosis.                                                                                                                                                                                           | Death                                                                         | S4 |
| Kadosh et al                        | 1   | 56                        | M            | Black                              | 7.78                                                                | 7.4 g / day                 | N/A  | AKI + nephrotic range<br>proteinuria                        | Collapsing glomerulopathy                                                                                                                                                                                             | Improvement of renal function with<br>supportive care, no dialysis            | 38 |
| Couturier et al                     | 2   | 53                        | M            | Black                              | 2.19 ; 5.32                                                         | 1870 mg/mmol;<br>2.65 g/day | No   | AKI + proteinuria                                           | 2/2 Collapsing glomerulopathy                                                                                                                                                                                         | Improvement of renal function,<br>persistence of sub-nephrotic<br>proteinuria | 39 |
| Huang et al                         | 1   | 65                        | F            | Chinese                            | 1.09                                                                | 288.8 mg/g                  | Yes  | Nephritic syndrome                                          | IgA nephropathy                                                                                                                                                                                                       | Reduced hematuria + proteinuria                                               | 48 |
| Nlandu et al                        | 1   | 48                        | M            | Black                              | 15.9                                                                | 18 g/day                    | N/A  | AKI + nephrotic<br>syndrome                                 | Collapsing glomerulopathy                                                                                                                                                                                             | Dialysis, persistent proteinuria                                              | 40 |
| Shetty et al                        | 6** | 56<br>(Range<br>49-64)    | 3 M /<br>3 F | Black                              | Elevated<br>(Range:                                                 | Yes (range 0.6-<br>12.06)   | 5/6  | AKI + proteinuria                                           | 3/6 Collapsing glomerulopathy<br>3/6 Podocytopathy (1 FSGS)                                                                                                                                                           | 2/6 Dialysis<br>3/6 Recovery of renal function<br>2/6 Decreased proteinuria   | 29 |

|                     |    |               |           |                                         |                         |                         |                |                                                        |                                                                                                                                                                                                                                                                                                                            |                                                                                                                            |    |
|---------------------|----|---------------|-----------|-----------------------------------------|-------------------------|-------------------------|----------------|--------------------------------------------------------|----------------------------------------------------------------------------------------------------------------------------------------------------------------------------------------------------------------------------------------------------------------------------------------------------------------------------|----------------------------------------------------------------------------------------------------------------------------|----|
|                     |    |               |           |                                         | 2.35 – 13.52)           |                         |                |                                                        |                                                                                                                                                                                                                                                                                                                            |                                                                                                                            |    |
| Fontana et al       | 2  | 60.5 (50; 71) | 2 M       | White                                   | Elevated                | Yes (1/2; 1.2 g/day)    | 1/2            | AKI                                                    | 2/2 Oxalate nephropathy                                                                                                                                                                                                                                                                                                    | 2/2 Dialysis; No return of renal function at discharge                                                                     | 44 |
| Izzedine et al      | 2  | 62.5 (38; 49) | 2 F       | Antilles; African                       | Elevated (8.63 – 11.68) | Yes (2.16-2.34 mg/mmol) | 1/2            | AKI + proteinuria                                      | 2/2 Collapsing glomerulopathy                                                                                                                                                                                                                                                                                              | 1/2 Dialysis                                                                                                               | 41 |
| Sandhu et al        | 1  | 22            | M         | White                                   | Normal                  | Yes, 2 g/day            | Yes            | Proteinuria                                            | IgA nephropathy                                                                                                                                                                                                                                                                                                            | Normal renal function, no active urinary sediment                                                                          | 2  |
| Suso et al          | 1  | 78            | M         | White                                   | Elevated, 1.96          | Yes, 10 g/day           | Yes            | AKI + nephritic / nephrotic syndrome                   | IgA nephropathy                                                                                                                                                                                                                                                                                                            | Improvement in renal function, persistent proteinuria and hematuria                                                        | 49 |
| Brix et al          | 1  | 44            | M         | White                                   | Elevated                | Unknown                 | Yes            | AKI                                                    | Anti-GBM disease                                                                                                                                                                                                                                                                                                           | Unknown, received plasmapheresis and cyclophosphamide                                                                      | 46 |
| Papadimitriou et al | 2  | 52; 64        | 2 M       | Unknown                                 | 7.5; 1.4                | Yes (1.85; 7.4)         | Unknown        | AKI + proteinuria                                      | 2/2 ATI<br>1/2 Secondary FSGS                                                                                                                                                                                                                                                                                              | 1/2 Dialysis, discontinued after 11 weeks                                                                                  | 19 |
| Ferlicot et al      | 47 | 63            | 38 M, 9 F | Unknown                                 | 1.79                    | Mean 2.52               | 22/47 patients | 46/47 AKI<br>9/47 nephrotic syndrome                   | 20/47 ATI<br>11/47 Collapsing FSGS<br>5/47 FSGS-NOS<br>1/47 FSGS-Tip<br>1/47 TMA<br>1/47 Arteritis<br>1/47 AA amyloidosis<br>2/47 Membranous (PLA2R +)<br>1/47 Crescentic GN<br>1/47 IgA Nephropathy<br>1/47 Light chain cast nephropathy<br>1/47 Calcineurin inhibitor nephrotoxicity<br>1/47 Grade III IF/TA (allograft) | 30/47 required dialysis<br>16/30 who required dialysis remained dialysis dependent<br>9/47 died                            | 20 |
| Szajek et al        | 1  | 62            | M         | White                                   | 5.87                    | Minimal on UA           | Yes            | AKI + microscopic hematuria                            | Granulomatous tubulointerstitial nephritis                                                                                                                                                                                                                                                                                 | Required CVVH, had progressive improvement of kidney function without requirement for KRT                                  | 28 |
| Gupta et al         | 2  | 71; 54        | 2 M       | 1 Indian; 1 African American            | 4.49; 4.69              | 16 g; 16 g              | No             | 2/2 AKI + nephrotic syndrome                           | 1/2 MCD, ATI<br>1/2 Collapsing FSGS                                                                                                                                                                                                                                                                                        | 1/2 Dialysis<br>1/2 Lost to follow-up                                                                                      | 21 |
| Koc et al           | 1  | 80            | F         | Unknown                                 | 6.0                     | 5.8                     | Yes            | AKI + nephrotic range proteinuria                      | Anti-GBM disease; acute interstitial nephritis                                                                                                                                                                                                                                                                             | Death                                                                                                                      | 47 |
| Li et al            | 1  | 30            | M         | White                                   | 0.58                    | 0.576 g/mmol            | Yes            | Nephritic syndrome                                     | IgA vasculitis                                                                                                                                                                                                                                                                                                             | Preserved kidney function on corticosteroids                                                                               | 50 |
| Nasr et al          | 13 | 52            | 12 M, 1 F | 9 African American; 2 Hispanic; 2 White | Elevated                | Yes, all 13 patients    | Yes, 10/13     | 13/13 AKI; 6/13 CKD; 11/13 nephrotic range proteinuria | 8/13 Collapsing FSGS<br>1/13 Membranous (PLA2R neg, THSD7A neg)<br>3/13 Diabetic glomerulosclerosis<br>1/13 IgA nephropathy                                                                                                                                                                                                | 10/13 required dialysis, 6/13 remained on dialysis<br>2/13 who did not require dialysis had improvement in kidney function | 42 |
| Sethi et al         | 1  | 25            | F         | White                                   | 2.4                     | 13                      | Yes            | AKI + nephrotic syndrome                               | Membranoproliferative glomerulonephritis, immune complex type                                                                                                                                                                                                                                                              | No return of kidney function, nephrotic range proteinuria                                                                  | 45 |

|                |   |    |   |                     |      |             |         |                                                                                          |                                                                                                      |                                                                                                           |    |
|----------------|---|----|---|---------------------|------|-------------|---------|------------------------------------------------------------------------------------------|------------------------------------------------------------------------------------------------------|-----------------------------------------------------------------------------------------------------------|----|
| Lazareth et al | 1 | 29 | M | Sub-saharan African | 6.04 | 490 mg/mmol | Unknown | AKI + nephrotic syndrome in a transplant                                                 | Collapsing glomerulopathy<br>ATN<br>1 APOL1 risk allele in donor                                     | Partial recovery of kidney function                                                                       | 43 |
| Westhoff et al | 1 | 69 | M | Unknown             | 2.2  | Unknown     | Unknown | AKI in a kidney allograft (kidney-pancreas recipient with ESKD due to diabetes mellitus) | Interstitial inflammation and tubular injury associated with SARS-CoV-2 positivity by ISH and RT-PCR | Recovery of kidney function (Cr 1.2 mg/dL); No recovery of pancreas function with requirement for insulin | 22 |

Abbreviations: M, male; F, female; N/A, not applicable, AKI, acute kidney injury; ATI, acute tubular injury; CKD, chronic kidney disease; GBM, glomerular basement membrane; FSGS, focal segmental glomerulosclerosis; GN, glomerulonephritis; ATN, acute tubular necrosis; EM, electron microscopy; TMA, thrombotic microangiopathy; ANCA, anti-neutrophil cytoplasmic antibodies. \*Of 17 biopsies, 14 were native and three were allografts. \*\* Of 6 biopsies, 5 were native and one was an allograft.

**Supplemental Table 2.** Review of autopsy findings within kidneys of SARS-CoV-2 infected decedents

| Author                                                                                              | N= | Mean age   | Sex       | Race                                                    | Creatinine (mg/dL)                                   | Proteinuria >1 g/day | Hematuria Present/Absent  | Presentation           | Diagnosis                                                                                                                                                                            | Cause of Death and Conclusions                            | Ref       |
|-----------------------------------------------------------------------------------------------------|----|------------|-----------|---------------------------------------------------------|------------------------------------------------------|----------------------|---------------------------|------------------------|--------------------------------------------------------------------------------------------------------------------------------------------------------------------------------------|-----------------------------------------------------------|-----------|
| Bradley et al                                                                                       | 14 | 73.5       | 6 M, 8 F  | N/A                                                     | Elevated 6/14                                        | N/A                  | N/A                       | 8/14 CKD               | 11/14 ATI<br>14/14 Arterionephrosclerosis<br>2/14 Diabetic nephropathy<br>1/14 Amyloidosis                                                                                           | 14/14 ARDS or pneumonia<br>6/14 Kidney disease            | 11        |
| Farkash et al                                                                                       | 1  | 53         | M         | N/A                                                     | Elevated                                             | N/A                  | N/A                       | AKI                    | ATI with isometric vacuolization                                                                                                                                                     | Hypoxic respiratory failure, oliguric acute renal failure | 12        |
| Gaillard et al                                                                                      | 1  | 79         | M         | Black                                                   | Elevated (2.5)                                       | Yes                  | N/A                       | AKI on CKD3            | Collapsing glomerulopathy                                                                                                                                                            | ARDS, acute renal failure                                 | 36        |
| Su et al                                                                                            | 26 | 69         | 19 M, 7 F | 26/26 Chinese                                           | Elevated 18/26<br>Average: 1.32<br>Range: 0.4 to 5.2 | 7/26                 | 4/26                      | AKI                    | 26/26 ATI<br>2/26 Acute pyelonephritis<br>3/26 ATI contained pigmented casts<br>3/26 Fibrin thrombi without overt TMA                                                                | Multisystem organ failure<br>2/2 COVID-19                 | 13        |
| Munoz Casablanca et al (abstract)                                                                   | 17 | 64         | 12 M, 5 F | 3/17 Black, 14/17 not specified                         | Range: 0.96 to 2.98                                  | 1/17                 | 1/17                      | 12/17 AKI              | 9/17 ATI<br>1/17 had TMA and ATI.<br>Diabetic nephropathy<br>Arterionephrosclerosis                                                                                                  | No data provided                                          | S5        |
| Salvatore et al (abstract);<br>Elsoukkary et al (manuscript)<br><br>(n=34, details for 30 patients) | 30 | 68.5       | 6 M, 24 F | 38% White, 29% Hispanic, 15% Black, 9% Indian, 9% Asian | Elevated Mean 1.7<br><br>Range: 0.7 to 9.6           | 0/30                 | N/A                       | 18/30 AKI<br>2/30 ESKD | ATI ('n' not provided)<br>2/30 Obesity related glomerulopathy<br>1/30 Atheroemboli<br>1/30 Bilateral infarction<br>2/30 Papillary necrosis<br>2/30 TMA<br>14/30 Diabetic nephropathy | No data provided                                          | S6;<br>16 |
| Golmai et al                                                                                        | 12 | 70.25      | 10 M, 2 F | 6/12 Hispanic, 3/12 Black, 3/12 White                   | Elevated<br>Average: 5.27<br>Range: 2.35-11          | 12/12                | Yes, number not specified | 12/12 AKI              | 9/12 ATI/ATN<br>1/12 AIN<br>1/12 Oxalate nephropathy<br>4/12 Medullary urate crystals<br>2/12 Diabetic nephropathy                                                                   | No data provided                                          | 14        |
| Diao et al                                                                                          | 6  | 69 (51-86) | 4 M, 2 F  | 6/6 Chinese                                             | Not specified                                        | Not specified        | Not specified             | Not specified          | 6/6 ATN (6/6 reported autolysis)<br>2/6 Severe interstitial inflammation                                                                                                             | No data provided                                          | 17        |
| Xia et al                                                                                           | 10 | 69 (57-86) | 8 M, 2 F  | 10/10 Chinese                                           | Elevated 10/10; mean 1.21,                           | Not specified        | Not specified             | 10/10 AKI              | 8/10 ATI<br>1/10 Venous thrombosis<br>7/10 Arteriosclerosis                                                                                                                          | ARDS, septic shock, coagulopathy, acute renal failure     | 18        |

|                             |    |      |            |                                  |                                    |                                    |         |                                     |                                                                                                                                  |                                                                                                                              |    |
|-----------------------------|----|------|------------|----------------------------------|------------------------------------|------------------------------------|---------|-------------------------------------|----------------------------------------------------------------------------------------------------------------------------------|------------------------------------------------------------------------------------------------------------------------------|----|
|                             |    |      |            |                                  | range = 0.64-2.29                  |                                    |         |                                     |                                                                                                                                  | 1/10 Glomerulomegaly                                                                                                         |    |
| Santoriello et al           | 42 | 71.5 | 29 M, 13 F | 24/42 Hispanic, 18/42 unknown    | Elevated 31/33 (with Cr available) | 23/29 (with proteinuria available) | N/A     | 31/33 AKI                           | 19/31 ATI<br>6/42 Fibrin thrombi<br>1/42 Collapsing FSGS<br>42/42 Arteriosclerosis                                               | ARDS or pneumonia (n=30), decompensated heart failure (n=3), intracranial hemorrhage (n=2), MI (n=1)                         | 15 |
| Simms et al                 | 1  | 67   | M          | Unknown                          | 0.57                               | Unknown                            | Unknown | ESKD, transplant at 10 days Cr 0.57 | No histopathologic abnormalities (in allograft at autopsy)                                                                       | SARS-CoV-2 positive donor and in recipient who has SARS-CoV-2 negative prior, suggests transmissibility by kidney transplant | 25 |
| Alshomrani et al (abstract) | 9  | 67   | 8 M, 1 F   | Unknown                          | Unknown                            | Unknown                            | Unknown | AKI                                 | 7/9 ATI<br>3/9 Microthrombi<br>3/9 Arteriosclerosis<br>2/9 Glomerulopathy<br>2/9 Myocyte necrosis                                | Pneumonia or diffuse alveolar damage/ARDS                                                                                    | S7 |
| Rapkiewicz et al            | 7  | 57   | 3 M, 4 F   | 3 White<br>3 Hispanic<br>1 Black | Unknown                            | Unknown                            | Unknown | AKI                                 | ATN with pigmented casts<br>Platelet-rich microthrombi<br>Arteriosclerosis<br>Viral-like particles in proximal tubules and by EM | Multi-organ system dysfunction                                                                                               | 24 |

Abbreviations: M, male; F, female; N/A, not applicable, AKI, acute kidney injury; ATI, acute tubular injury; CKD, chronic kidney disease; glomerular basement membrane; FSGS, focal segmental glomerulosclerosis; ATN, acute tubular necrosis; TMA, thrombotic microangiopathy; ARDS, acute respiratory distress syndrome; COVID-19, Coronavirus disease-19; MI, myocardial infarction.

**Supplemental Table 3.** Comparison of COVID-19 biopsy diagnosis to COVID-19 disease severity. Scale: Mild = asymptomatic COVID-19 infection or symptomatic COVID-19 infection without increased oxygen requirements in outpatients; Moderate = COVID-19 infection required inpatient hospitalization without mechanical ventilation and/or dialysis; Severe = COVID-19 infection required intensive care unit admission and/or mechanical ventilation or dialysis.

**3A) Native kidney biopsies**

| <b>Diagnosis</b>                          | <b>Mild</b> | <b>Moderate</b> | <b>Severe</b> | <b>Unknown</b> |
|-------------------------------------------|-------------|-----------------|---------------|----------------|
| Collapsing Glomerulopathy                 | 4           | 21              | 27            | 10             |
| Acute Tubular Injury                      | 2           | 11              | 16            | 3              |
| Diabetic Nephropathy                      | 8           | 16              | 3             | 2              |
| Podocytopathies                           | 4           | 6               | 5             | 3              |
| Pauci-Immune Crescentic GN                | 2           | 4               | 3             | 2              |
| Membranous Nephropathy                    | 5           | 0               | 2             | 4              |
| Myoglobin Cast Nephropathy                | 0           | 1               | 6             | 1              |
| Infection-Associated GN                   | 1           | 4               | 3             | 0              |
| Arterionephrosclerosis                    | 1           | 4               | 3             | 0              |
| FSGS, Secondary                           | 2           | 3               | 0             | 3              |
| IgA Nephropathy                           | 4           | 2               | 0             | 1              |
| Lupus Nephritis                           | 2           | 1               | 3             | 0              |
| Thrombotic Microangiopathy                | 0           | 2               | 3             | 0              |
| Amyloidosis                               | 0           | 2               | 1             | 1              |
| Acute Interstitial Nephritis              | 1           | 2               | 1             | 0              |
| PGMID                                     | 1           | 3               | 0             | 0              |
| Cryoglobulinemic GN                       | 1           | 1               | 0             | 1              |
| Acute Pyelonephritis                      | 0           | 1               | 1             | 0              |
| Light Chain Cast Nephropathy              | 0           | 0               | 1             | 1              |
| MGMID                                     | 0           | 1               | 0             | 0              |
| Cortical Infarct                          | 0           | 0               | 1             | 0              |
| Anti-GBM Disease                          | 0           | 0               | 0             | 1              |
| Fibrillary Glomerulopathy                 | 0           | 0               | 1             | 0              |
| Light Chain Deposition Disease            | 1           | 0               | 0             | 0              |
| Hemoglobin Cast Nephropathy               | 0           | 0               | 0             | 1              |
| Thin Glomerular Basement Membrane Disease | 0           | 0               | 0             | 1              |
| Sickle Cell Nephropathy                   | 0           | 1               | 0             | 0              |

**3B) Allograft biopsies.**

| <b>Diagnosis</b>            | <b>Mild</b> | <b>Moderate</b> | <b>Severe</b> | <b>Unknown</b> |
|-----------------------------|-------------|-----------------|---------------|----------------|
| Antibody-Mediated Rejection | 4           | 6               | 1             | 6              |
| T-Cell Mediated Rejection   | 2           | 1               | 2             | 1              |
| Mixed Rejection             | 0           | 4               | 0             | 0              |
| Acute Tubular Injury        | 1           | 6               | 2             | 3              |
| Negative for Rejection      | 1           | 0               | 1             | 0              |
| IgA Nephropathy             | 1           | 0               | 0             | 0              |
| Collapsing Glomerulopathy   | 0           | 2               | 0             | 0              |



**Supplemental Table 4.** Histopathologic features of podocyte diseases within native and transplant kidney biopsies from COVID-19 patients.

| Diagnosis                                            | n  | % GGS         | Segmental Sclerosis | IF/TA                                                                          | Arteriosclerosis                                                                | Arteriolar Hyalinosis                                          | Foot Process Effacement                                                       |
|------------------------------------------------------|----|---------------|---------------------|--------------------------------------------------------------------------------|---------------------------------------------------------------------------------|----------------------------------------------------------------|-------------------------------------------------------------------------------|
| <b>Native biopsies</b>                               |    |               |                     |                                                                                |                                                                                 |                                                                |                                                                               |
| Collapsing Glomerulopathy                            | 62 | 37.6% ± 25.0% | 62/62               | None: 1/62<br>Mild: 17/62<br>Moderate: 24/62<br>Severe: 19/62<br>No data: 1/62 | None: 11/62<br>Mild: 12/62<br>Moderate: 12/62<br>Severe: 26/62<br>No data: 1/62 | None: 23/62<br>Mild: 12/62<br>Moderate: 14/62<br>Severe: 13/62 | None: 0/62<br>Mild: 2/62<br>Moderate: 5/62<br>Severe: 43/62<br>No data: 12/62 |
| Primary Podocytopathies (MCD n=11, Primary FSGS n=7) | 18 | 15.6% ± 26.2% | 7/18                | None: 6/18<br>Mild: 7/18<br>Moderate: 3/18<br>Severe: 1/18<br>No data: 1/18    | None: 7/18<br>Mild: 4/18<br>Moderate: 1/18<br>Severe: 6/18                      | None: 8/18<br>Mild: 5/18<br>Moderate: 2/18<br>Severe: 3/18     | None: 0/18<br>Mild: 0/18<br>Moderate: 0/18<br>Severe: 18/18                   |
| Secondary FSGS                                       | 8  | 46.7% ± 19.8% | 8/8                 | None: 0/8<br>Mild: 0/8<br>Moderate: 4/8<br>Severe: 4/8                         | None: 1/8<br>Mild: 1/8<br>Moderate: 2/8<br>Severe: 4/8                          | None: 2/8<br>Mild: 1/8<br>Moderate: 1/8<br>Severe: 4/8         | None: 0/8<br>Mild: 3/8<br>Moderate: 0/8<br>Severe: 4/8<br>No data: 1/8        |
| <b>Transplant biopsies</b>                           |    |               |                     |                                                                                |                                                                                 |                                                                |                                                                               |
| Collapsing Glomerulopathy                            | 2  | 6.5% ± 9.1%   | 2/2                 | None: 0/2<br>Mild: 2/2<br>Moderate: 0/2<br>Severe: 0/2                         | None: 1/2<br>Mild: 1/2<br>Moderate: 0/2<br>Severe: 0/2                          | None: 2/2<br>Mild: 0/2<br>Moderate: 0/2<br>Severe: 0/2         | None: 2/2<br>Mild: 0/2<br>Moderate: 0/2<br>Severe: 2/2                        |

Abbreviations: FSGS, focal segmental glomerulosclerosis; GGS; global glomerulosclerosis; IF/TA, interstitial fibrosis and tubular atrophy. GGS expressed as mean ± standard deviation. For parameters represented as fractions, the frequency of positivity for each parameter is shown. GGS expressed as mean ± standard deviation. Electron microscopy performed on 50/62 Collapsing Glomerulopathy cases and 7/8 secondary FSGS cases (tissue unavailable in remainder of cases).

**Supplemental Table 5.** A) Light microscopic features of glomerular diseases, excluding podocytopathies, in native kidney biopsies from COVID-19 patients; B) Immunofluorescence and ultrastructure of these glomerular diseases.

**A) Light microscopic features of glomerular disease cases.**

| Diagnosis                 | N= | % GGS<br>±          | Seg<br>Scl | IF/TA                                                                  | Art Scl                                                                  | Mes Exp/<br>Mes HC | Endo<br>HC | Fib Nec<br>/ Cres | Hyaline<br>Thrombi | ATI       | Edema | Micro-<br>changes |
|---------------------------|----|---------------------|------------|------------------------------------------------------------------------|--------------------------------------------------------------------------|--------------------|------------|-------------------|--------------------|-----------|-------|-------------------|
| Membranous glomerulopathy | 11 | 22.7%<br>±<br>23.6% | 9/11       | None: 2/11<br>Mild: 4/11<br>Moderate:<br>2/11<br>Severe: 3/11          | None: 3/11<br>Mild: 1/11<br>Moderate: 4/11<br>Severe: 3/11               | 9/11;<br>5/11      | 1/5        | 1/11              | 0/11               | 7/1<br>1  | 4/11  | 1/11              |
| Crescentic GN             | 11 | 9.9% ±<br>11.7%     | 3/11       | None: 3/11<br>Mild: 5/11<br>Moderate:<br>1/11<br>Severe: 2/11          | None: 3/11<br>Mild: 0/11<br>Moderate: 3/11<br>Severe: 4/11<br>None: 1/11 | 2/11;<br>0/11      | 0/11       | 11/11             | 0/11               | 10/<br>11 | 7/11  | 0/11              |
| Infection-associated GN   | 8  | 12.5%<br>±<br>12.4% | 1/8        | None: 4/8<br>Mild: 2/8<br>Moderate: 1/8<br>Severe: 1/8                 | None: 2/8<br>Mild: 1/8<br>Moderate: 2/8<br>Severe: 2/8<br>No data: 1/8   | 7/8; 7/8           | 8/8        | 2/8               | 0/8                | 7/8       | 4/8   | 0/8               |
| Cryo-GN                   | 3  | 3.9% ±<br>4.2%      | 0/3        | None: 1/3<br>Mild: 2/3<br>Moderate: 0/3<br>Severe: 0/3                 | None: 1/3<br>Mild: 0/3<br>Moderate: 1/3<br>Severe: 1/3                   | 2/3, 2/3           | 3/3        | 0/3               | 3/3                | 3/3       | 2/3   | 1/3               |
| IgA nephropathy           | 7  | 20.6 ±<br>28.0      | 4/7        | None: 4/7<br>Mild: 1/7<br>Moderate: 0/7<br>Severe: 2/7                 | None: 4/7<br>Mild: 0/7<br>Moderate: 0/7<br>Severe: 2/7<br>No data: 1/7   | 6/7; 4/7           | 3/7        | 2/7               | 0/7                | 4/7       | 3/7   | 0/7               |
| Lupus nephritis*          | 6  | 26.3%<br>±<br>30.5% | 4/6        | None: 2/6<br>Mild: 1/6<br>Moderate: 1/6<br>Severe: 1/6<br>No data: 1/6 | None: 1/6<br>Mild: 2/6<br>Moderate: 2/6<br>Severe: 0/6<br>No data: 1/6   | 4/6; 3/6           | 1/6        | 1/6               | 1/6                | 2/6       | 2/6   | 1/6               |

|                         |   |                     |     |                                                        |                                                        |          |     |     |     |     |     |     |
|-------------------------|---|---------------------|-----|--------------------------------------------------------|--------------------------------------------------------|----------|-----|-----|-----|-----|-----|-----|
| Sickle cell nephropathy | 1 | 13.5%               | 1/1 | Moderate                                               | Mild                                                   | 0/1; 0/1 | 0/1 | 0/1 | 0/1 | 1/1 | 1/1 | 1/1 |
| PGMID                   | 4 | 16.4%<br>±<br>15.6% | 2/4 | None: 0/4<br>Mild: 2/4<br>Moderate: 2/4<br>Severe: 0/4 | None: 1/4<br>Mild: 1/4<br>Moderate: 1/4<br>Severe: 1/4 | 4/4; 3/4 | 2/4 | 1/4 | 2/4 | 4/4 | 4/4 | 1/4 |
| MGMID                   | 1 | 54.5%               | 1/1 | Moderate                                               | Moderate                                               | 1/1; 1/1 | 1/1 | 1/1 | 0/1 | 1/1 | 1/1 | 1/1 |
| Anti-GBM disease        | 1 | 12.4%               | 0/1 | None                                                   | None                                                   | 0/1; 0/1 | 1/1 | 1/1 | 0/1 | 1/1 | 1/1 | 0/1 |

\* Two cases in the lupus nephritis group were limited samples, two with no arteries for evaluation and one with insufficient cortex for evaluation of tubulointerstitial scarring

Abbreviations: GN, glomerulonephritis; GGS, global glomerulosclerosis; Seg Scl, segmental sclerosis; IF/TA, interstitial fibrosis/tubular atrophy; Art Scl, arteriosclerosis; Mes Exp/Mes HC, mesangial expansion and hypercellularity; Endo HC, endocapillary hypercellularity; Fib Nec/Cres, fibrinoid necrosis or crescent formation; ATI, acute tubular injury; Interst Inflamm, interstitial inflammation; Micro-changes, microangiopathic changes. GGS expressed as mean ± standard deviation. For parameters represented as fractions, the frequency of positivity for each parameter is shown.

### 5B) Immunofluorescence and ultrastructural features of glomerular disease cases.

| Diagnoses                               | Number Cases | IgA     | IgG     | IgM     | C3      | C1q     | Mesangial Deposits* | Subepithelial deposits* | Subendothelial deposits* |
|-----------------------------------------|--------------|---------|---------|---------|---------|---------|---------------------|-------------------------|--------------------------|
| Membranous                              | 11           | 1/11    | 11/11   | 5/11    | 10/11   | 2/10**  | 3/9*                | 9/9*                    | 0/9                      |
| Crescentic glomerulonephritis           | 11           | 3/10*** | 3/10*** | 3/10*** | 4/10*** | 0/10*** | 2/6*                | 0/6*                    | 0/6*                     |
| Infection-Associated glomerulonephritis | 8            | 3/8     | 4/8     | 0/8     | 6/8     | 2/8     | 5/7*                | 3/7*                    | 4/7*                     |
| Cryoglobulinemic glomerulonephritis     | 3            | 2/3     | 3/3     | 3/3     | 3/3     | 0/3     | 2/3                 | 1/3                     | 3/3                      |
| IgA nephropathy                         | 7            | 7/7     | 4/7     | 6/7     | 6/7     | 0/7     | 5/6*                | 0/6*                    | 1/6*                     |
| Lupus nephritis                         | 6            | 6/6     | 6/6     | 6/6     | 6/6     | 4/6     | 3/3*                | 3/3*                    | 2/3*                     |
| Sickle cell nephropathy                 | 1            | 0/1     | 0/1     | 0/1     | 0/1     | 0/1     | 1/1                 | 0/1                     | 0/1                      |
| PGMID                                   | 4            | 0/4     | 3/4     | 0/4     | 3/4     | 2/4     | 4/4                 | 3/4                     | 3/4                      |
| MGMID                                   | 1            | 0/1     | 1/1     | 1/1     | 0/1     | 0/1     | 1/1                 | 0/1                     | 0/1                      |
| Anti-GBM disease                        | 1            | 0/1     | 1/1     | 0/1     | 1/1     | 0/1     | 0/1                 | 1/1                     | 0/1                      |

\*Not all cases had electron microscopy available for evaluation.

\*\*One case in the membranous group lacked C1q staining.

\*\*\*One case in the crescentic glomerulonephritis group lacked immunofluorescence microscopy.

**Supplemental Table 6.** Histopathologic features of tubulointerstitial diseases in COVID-19 native and transplant kidney biopsies.

| Diagnosis                      | N= | GGS           | IF/TA                                                       | Arteriosclerosis                                                       | Arteriolar hyalinosis                                       | ATI   | Edema | Interstitial Inflammation | Tubulitis |
|--------------------------------|----|---------------|-------------------------------------------------------------|------------------------------------------------------------------------|-------------------------------------------------------------|-------|-------|---------------------------|-----------|
| Acute Tubular Injury           | 32 | 21.5% ± 22.0% | None: 7/32<br>Mild: 12/32<br>Moderate: 6/32<br>Severe: 7/32 | None: 11/32<br>Mild: 2/32<br>Moderate: 5/32<br>Severe: 14/32           | None: 10/32<br>Mild: 8/32<br>Moderate: 6/32<br>Severe: 8/32 | 32/32 | 21/32 | 8/32                      | 1/32      |
| Acute Interstitial Nephritis   | 4  | 11.3% ± 10.3% | None: 2/4<br>Mild: 0/4<br>Moderate: 2/4<br>Severe: 0/4      | None: 1/4<br>Mild: 1/4<br>Moderate: 1/4<br>Severe: 1/4                 | None: 1/4<br>Mild: 2/4<br>Moderate: 1/4<br>Severe: 0/4      | 4/4   | 4/4   | 4/4                       | 4/4       |
| Myoglobin Cast Nephropathy     | 8  | 14.9% ± 13.9% | None: 2/8<br>Mild: 5/8<br>Moderate: 1/8<br>Severe: 0/8      | None: 2/8<br>Mild: 1/8<br>Moderate: 0/8<br>Severe: 4/8<br>No data: 1/8 | None: 5/8<br>Mild: 2/8<br>Moderate: 1/8<br>Severe: 0/8      | 8/8   | 2/8   | 3/8                       | 1/8       |
| Hemoglobin cast nephropathy    | 1  | 0             | None                                                        | Mild                                                                   | None                                                        | 1/1   | 1/1   | 0/1                       | 0/1       |
| Cortical infarct               | 1  | 6.7%          | None                                                        | None                                                                   | None                                                        | 1/1   | 1/1   | 1/1                       | 0/1       |
| Acute Pyelonephritis           | 2  | 21.3% ± 1.8%  | None: 0/2<br>Mild: 2/2<br>Moderate: 0/2<br>Severe: 0/2      | None: 0/2<br>Mild: 1/2<br>Moderate: 0/2<br>Severe: 1/2                 | None: 1/2<br>Mild: 1/2<br>Moderate: 0/2<br>Severe: 0/2      | 2/2   | 2/2   | 2/2                       | 1/2       |
| Light chain deposition disease | 1  | 30.3%         | Moderate                                                    | Severe                                                                 | Severe                                                      | 1/1   | 1/1   | 1/1                       | 1/1       |
| Light chain cast nephropathy   | 2  | 6.5% ± 9.2%   | None: 0/2<br>Mild: 1/2<br>Moderate: 0/2<br>Severe: 1/2      | None: 0/2<br>Mild: 1/2<br>Moderate: 0/2<br>Severe: 1/2                 | None: 1/2<br>Mild: 0/2<br>Moderate: 1/2<br>Severe: 0/2      | 2/2   | 2/2   | 1/2                       | 1/2       |
| <b>Transplant</b>              |    |               |                                                             |                                                                        |                                                             |       |       |                           |           |

|                      |    |               |                                                            |                                                                             |                                                                            |       |       |      |      |
|----------------------|----|---------------|------------------------------------------------------------|-----------------------------------------------------------------------------|----------------------------------------------------------------------------|-------|-------|------|------|
| Acute Tubular Injury | 12 | 14.8% ± 19.6% | None: 3/12<br>Mild: 3/12<br>Moderate: 5/12<br>Severe: 1/12 | None: 3/12<br>Mild: 7/12<br>Moderate: 0/12<br>Severe: 1/12<br>No data: 1/12 | None: 5/12<br>Mild: 4/12<br>Moderate: 0/12<br>Severe: 2/12<br>No data: 1/2 | 12/12 | 12/12 | 2/12 | 1/12 |
|----------------------|----|---------------|------------------------------------------------------------|-----------------------------------------------------------------------------|----------------------------------------------------------------------------|-------|-------|------|------|

Abbreviations: GGS, global glomerulosclerosis; IF/TA, interstitial fibrosis/tubular atrophy; ATI, acute tubular injury. GGS expressed as mean ± standard deviation. For parameters represented as fractions, the frequency of positivity for each parameter is shown.

**Supplemental Table 7.** Histopathologic features of vascular diseases in COVID-19 native and transplant kidney biopsies.

| Diagnosis                  | N = | GGS           | Segmental Sclerosis | IF/TA                                                                  | Arteriosclerosis                                                       | Arteriolar hyalinosis                                  | Glomerular Micro-angiopathic changes | Vascular Micro-angiopathic changes | ATI |
|----------------------------|-----|---------------|---------------------|------------------------------------------------------------------------|------------------------------------------------------------------------|--------------------------------------------------------|--------------------------------------|------------------------------------|-----|
| Arterionephrosclerosis     | 8   | 63.6% ± 21.7% | 3/8                 | None: 0/8<br>Mild: 0/8<br>Moderate: 0/8<br>Severe: 7/8<br>No data: 1/8 | None: 0/8<br>Mild: 1/8<br>Moderate: 0/8<br>Severe: 6/8<br>No data: 1/8 | None: 1/8<br>Mild: 2/8<br>Moderate: 0/8<br>Severe: 5/8 | 0/8                                  | 2/8                                | 3/8 |
| Thrombotic microangiopathy | 5   | 13.3% ± 16.3% | 2/5                 | None: 2/5<br>Mild: 1/5<br>Moderate: 1/5<br>Severe: 1/5                 | None: 2/5<br>Mild: 1/5<br>Moderate: 0/5<br>Severe: 1/5<br>No data: 1/5 | None: 2/5<br>Mild: 1/5<br>Moderate: 1/5<br>Severe: 1/5 | 2/5                                  | 5/5                                | 5/5 |

Abbreviations: GGS, Global Glomerulosclerosis; IF/TA, Interstitial Fibrosis/Tubular Atrophy; ATI, Acute Tubular Injury. GGS expressed as mean ± standard deviation. For parameters represented as fractions, the frequency of positivity for each parameter is shown.

**Supplemental Table 8:** Histopathologic features of chronic diseases in COVID-19 native and transplant kidney biopsies.

| Diagnosis                                 | N = | GGS          | Segmental Sclerosis | IF/TA                                                       | Arteriosclerosis                                            | Arteriolar Hyalinosis                                       | Mesangial expansion | ATI   |
|-------------------------------------------|-----|--------------|---------------------|-------------------------------------------------------------|-------------------------------------------------------------|-------------------------------------------------------------|---------------------|-------|
| Diabetic Nephropathy                      | 29  | 53.4% ±18.8% | 26/29               | None: 1/29<br>Mild: 2/29<br>Moderate: 4/29<br>Severe: 22/29 | None: 0/29<br>Mild: 5/29<br>Moderate: 5/29<br>Severe: 19/29 | None: 1/29<br>Mild: 2/29<br>Moderate: 4/29<br>Severe: 22/29 | 29/29               | 15/29 |
| Amyloidosis                               | 4   | 29.3% ± 5.5% | 0/4                 | None: 0/4<br>Mild: 1/4<br>Moderate: 3/4<br>Severe: 0/4      | None: 0/2*<br>Mild: 1/3*<br>Moderate: 0/3*<br>Severe: 2/3*  | None: 2/3*<br>Mild: 0/3*<br>Moderate: 0/3*<br>Severe: 1/3*  | 4/4                 | 3/4   |
| Fibrillary glomerulopathy                 | 1   | 86.4%        | 0/1                 | Severe                                                      | Severe                                                      | Severe                                                      | 1/1                 | 0/1   |
| Thin Glomerular Basement Membrane Disease | 1   | 6.7%         | 0/1                 | None                                                        | Mild                                                        | None                                                        | 0/1                 | 0/1   |

Abbreviations: GGS, Global glomerulosclerosis; IF/TA, Interstitial fibrosis/tubular atrophy; ATI, Acute tubular injury. GGS expressed as mean ± standard deviation. For parameters represented as fractions, the frequency of positivity for each parameter is shown.

\*One limited sample without vessels available for evaluation in the amyloidosis group.

**Supplemental Table 9.** Histopathologic features of kidney diseases within transplant biopsies from COVID-19 patients.

| Diagnosis              | N= | GGs           | Seg Scl | if                                       | ta                                       | cv                                       | ah                                       | g                                        | ptc                                       | cg                                       | i                                        | t                                        | v                                         | C4d (≥2) | ATI   |
|------------------------|----|---------------|---------|------------------------------------------|------------------------------------------|------------------------------------------|------------------------------------------|------------------------------------------|-------------------------------------------|------------------------------------------|------------------------------------------|------------------------------------------|-------------------------------------------|----------|-------|
| AMR                    | 17 | 19.1% ± 25.0% | 8/17    | 0: 4/17<br>1: 7/17<br>2: 4/17<br>3: 1/17 | 0: 2/17<br>1: 7/17<br>2: 4/17<br>3: 1/17 | 0: 3/17<br>1: 6/17<br>2: 6/17<br>3: 2/17 | 0: 7/17<br>1: 3/17<br>2: 0/17<br>3: 7/17 | 0: 2/17<br>1: 5/17<br>2: 3/17<br>3: 6/17 | 0: 0/17<br>1: 5/17<br>2: 11/17<br>3: 1/17 | 0: 6/17<br>1: 4/17<br>2: 1/17<br>3: 5/17 | 0: 9/17<br>1: 8/17<br>2: 0/17<br>3: 0/17 | 0: 7/17<br>1: 8/17<br>2: 2/17<br>3: 0/17 | 0: 14/17<br>1: 3/17<br>2: 0/17<br>3: 0/17 | 4/17     | 15/17 |
| TCMR                   | 6  | 9.9% ± 13.5%  | 1/6     | 0: 2/6<br>1: 1/6<br>2: 2/6<br>3: 1/6     | 0: 0/6<br>1: 2/6<br>2: 2/6<br>3: 2/6     | 0: 3/6<br>1: 0/6<br>2: 3/6<br>3: 0/6     | 0: 3/6<br>1: 1/6<br>2: 1/6<br>3: 1/6     | 0: 5/6<br>1: 1/6<br>2: 0/6<br>3: 0/6     | 0: 0/6<br>1: 0/6<br>2: 4/6<br>3: 1/6      | 0: 6/6<br>1: 0/6<br>2: 0/6<br>3: 0/6     | 0: 0/6<br>1: 2/6<br>2: 1/6<br>3: 3/6     | 0: 0/6<br>1: 0/6<br>2: 3/6<br>3: 3/6     | 0: 5/6<br>1: 0/6<br>2: 1/6<br>3: 0/6      | 0/6      | 5/6   |
| AMR and TCMR*          | 4  | 15.3% ± 19.4% | 0/4     | 0: 0/4<br>1: 1/4<br>2: 3/4<br>3: 0/4     | 0: 0/4<br>1: 1/4<br>2: 3/4<br>3: 0/4     | 0: 0/4<br>1: 1/4<br>2: 1/4<br>3: 1/4     | 0: 2/4<br>1: 1/4<br>2: 1/4<br>3: 0/4     | 0: 1/4<br>1: 2/4<br>2: 0/4<br>3: 1/4     | 0: 0/4<br>1: 0/4<br>2: 3/4<br>3: 1/4      | 0: 4/4<br>1: 0/4<br>2: 0/4<br>3: 0/4     | 0: 0/4<br>1: 0/4<br>2: 3/4<br>3: 1/4     | 0: 0/4<br>1: 1/4<br>2: 2/4<br>3: 1/4     | 0: 1/4<br>1: 1/4<br>2: 1/4<br>3: 0/4      | 2/4      | 4/4   |
| Negative for Rejection | 2  | 0%            | 0/2     | 0: 1/2<br>1: 0/2<br>2: 1/2<br>3: 0/2     | 0: 1/2<br>1: 0/2<br>2: 1/2<br>3: 0/2     | 0: 0/2<br>1: 1/2<br>2: 0/2<br>3: 0/2     | 0: 2/2<br>1: 0/2<br>2: 0/2<br>3: 0/2     | 0: 2/2<br>1: 0/2<br>2: 0/2<br>3: 0/2     | 0: 2/2<br>1: 0/2<br>2: 0/2<br>3: 0/2      | 0: 2/2<br>1: 0/2<br>2: 0/2<br>3: 0/2     | 0: 2/2<br>1: 0/2<br>2: 0/2<br>3: 0/2     | 0: 2/2<br>1: 0/2<br>2: 0/2<br>3: 0/2     | 0: 2/2<br>1: 0/2<br>2: 0/2<br>3: 0/2      | 0/2      | 1/2   |
| IgA nephropathy        | 1  | 29.6%         | 1       | 1                                        | 1                                        | 2                                        | 2                                        | 0                                        | 0                                         | 0                                        | 0                                        | 0                                        | 0                                         | 0        | 0     |

\*One case in the AMR + TCMR group had no arteries available for evaluation.

Abbreviations: AMR, antibody-mediated rejection; TCMR, T-cell mediated rejection; GGS, global glomerulosclerosis; Seg scl, segmental sclerosis; if, interstitial fibrosis; ta, tubular atrophy; cv, chronic vascular (arteriosclerosis); ah, arteriolar hyalinosis; g, glomerulitis; cg, chronic glomerular (capillary loop double contours); i, interstitial inflammation; t, tubulitis; v, vasculitis/endothelialitis; ATI, acute tubular injury. All parameters are graded according to the Banff classification for allograft rejection. GGS expressed as mean ± standard deviation. For parameters represented as fractions, the frequency of positivity for each parameter is shown.

**Supplemental Table 10.** APOL1 genotypes on individual native biopsy cases to include main diagnosis and presence/absence of focal segmental glomerulosclerosis. Abbreviations: FSGS, focal segmental glomerulosclerosis; PGMID, proliferative glomerulonephritis with monoclonal IgG deposits; ANCA, anti-neutrophil cytoplasmic antibodies

| <b>Biopsy diagnosis</b>           | <b>FSGS?</b> | <b>Risk Alleles</b> | <b>Genotype</b> |
|-----------------------------------|--------------|---------------------|-----------------|
| Collapsing glomerulopathy         | Yes          | 2                   | G1/G1           |
| Collapsing glomerulopathy         | Yes          | 2                   | G1/G2           |
| Collapsing glomerulopathy         | Yes          | 2                   | G1/G2           |
| Collapsing glomerulopathy         | Yes          | 2                   | G1/G2           |
| Collapsing glomerulopathy         | Yes          | 2                   | G1/G2           |
| Collapsing glomerulopathy         | Yes          | 2                   | G1/G1           |
| Collapsing glomerulopathy         | Yes          | 2                   | G1/G2           |
| Collapsing glomerulopathy         | Yes          | 2                   | G1/G1           |
| Collapsing glomerulopathy         | Yes          | 2                   | G1/G2           |
| Collapsing glomerulopathy         | Yes          | 2                   | G1/G1           |
| Collapsing glomerulopathy         | Yes          | 2                   | G1/G1           |
| Collapsing glomerulopathy         | Yes          | 2                   | G1/G1           |
| Collapsing glomerulopathy         | Yes          | 0                   | G0/G0           |
| Collapsing glomerulopathy         | Yes          | 2                   | G1/G2           |
| Collapsing glomerulopathy         | Yes          | 2                   | G1/G2           |
| Collapsing glomerulopathy         | Yes          | 0                   | G0/G0           |
| Collapsing glomerulopathy         | Yes          | 2                   | G1/G2           |
| Collapsing glomerulopathy         | Yes          | 2                   | G1/G1           |
| Collapsing glomerulopathy         | Yes          | 2                   | G1/G2           |
| Collapsing glomerulopathy         | Yes          | 2                   | G2/G2           |
| Collapsing glomerulopathy         | Yes          | 2                   | G1/G1           |
| Collapsing glomerulopathy         | Yes          | 2                   | G1/G1           |
| Collapsing glomerulopathy         | Yes          | 2                   | G1/G1           |
| Collapsing glomerulopathy         | Yes          | 2                   | G1/G1           |
| Collapsing glomerulopathy + PGMID | Yes          | 2                   | G1/G1           |
| Collapsing glomerulopathy         | Yes          | 2                   | G2/G2           |
| Collapsing glomerulopathy         | Yes          | 2                   | G1/G1           |
| Collapsing glomerulopathy         | Yes          | 2                   | G1/G1           |



|                           |     |   |       |
|---------------------------|-----|---|-------|
| Collapsing glomerulopathy | Yes | 2 | G1/G2 |
| Collapsing glomerulopathy | Yes | 2 | G1/G1 |
| Collapsing glomerulopathy | Yes | 2 | G2/G2 |
| Collapsing glomerulopathy | Yes | 2 | G1/G1 |
| Collapsing glomerulopathy | Yes | 2 | G1/G1 |
| Collapsing glomerulopathy | Yes | 2 | G1/G1 |
| Collapsing glomerulopathy | Yes | 2 | G1/G1 |
| Collapsing glomerulopathy | Yes | 2 | G1/G1 |
| Collapsing glomerulopathy | Yes | 2 | G1/G1 |
| Collapsing glomerulopathy | Yes | 0 | G0/G0 |
| Collapsing glomerulopathy | Yes | 2 | G1/G2 |
| Collapsing glomerulopathy | Yes | 2 | G1/G2 |
| Collapsing glomerulopathy | Yes | 2 | G1/G2 |
| Collapsing glomerulopathy | Yes | 0 | G0/G0 |
| Collapsing glomerulopathy | Yes | 2 | G1/G1 |
| Collapsing glomerulopathy | Yes | 2 | G1/G1 |
| Collapsing glomerulopathy | Yes | 2 | G1/G2 |
| Collapsing glomerulopathy | Yes | 2 | G1/G2 |
| Collapsing glomerulopathy | Yes | 2 | G1/G2 |
| Collapsing glomerulopathy | Yes | 2 | G1/G2 |
| Acute tubular injury      | No  | 0 | G0/G0 |
| Acute tubular injury      | No  | 2 | G1/G2 |
| Acute tubular injury      | Yes | 2 | G1/G2 |
| Acute tubular injury      | Yes | 2 | G1/G2 |
| Acute tubular injury      | Yes | 2 | G1/G2 |
| Acute tubular injury      | Yes | 0 | G0/G0 |
| Acute tubular injury      | No  | 0 | G0/G0 |
| Acute tubular injury      | No  | 2 | G1/G1 |
| Acute tubular injury      | Yes | 2 | G1/G2 |
| Protracted tubular injury | Yes | 2 | G1/G1 |
| Diabetic nephropathy      | Yes | 0 | G0/G0 |
| Diabetic nephropathy      | Yes | 2 | G1/G1 |
| Diabetic nephropathy      | Yes | 0 | G0/G0 |

|                                    |     |   |       |
|------------------------------------|-----|---|-------|
| Diabetic nephropathy               | Yes | 1 | G0/G2 |
| Diabetic nephropathy               | Yes | 2 | G2/G2 |
| Diabetic nephropathy               | Yes | 0 | G0/G0 |
| Diabetic nephropathy               | Yes | 1 | G1/G0 |
| Diabetic nephropathy               | Yes | 0 | G0/G0 |
| Diabetic nephropathy               | No  | 0 | G0/G0 |
| Diabetic nephropathy               | Yes | 1 | G1/G0 |
| Diabetic nephropathy               | Yes | 1 | G0/G2 |
| Diabetic nephropathy               | Yes | 2 | G1/G2 |
| Diabetic nephropathy               | Yes | 2 | G1/G1 |
| Minimal change disease             | No  | 2 | G2/G2 |
| Minimal change disease             | No  | 2 | G1/G1 |
| Minimal change disease             | No  | 2 | G1/G1 |
| Minimal change disease             | No  | 2 | G1/G1 |
| Minimal change disease             | No  | 2 | G1/G2 |
| FSGS, favor primary                | Yes | 2 | G1/G1 |
| FSGS, tip variant                  | Yes | 0 | G0/G0 |
| Membranous glomerulopathy          | Yes | 1 | G0/G2 |
| Membranous glomerulopathy          | No  | 0 | G0/G0 |
| Membranous glomerulopathy          | Yes | 0 | G0/G0 |
| Membranous glomerulopathy          | Yes | 0 | G0/G0 |
| Membranous glomerulopathy          | Yes | 1 | G0/G2 |
| FSGS, favor secondary              | Yes | 2 | G1/G2 |
| FSGS, favor secondary              | Yes | 0 | G0/G0 |
| FSGS, favor secondary              | Yes | 2 | G1/G1 |
| FSGS, favor secondary              | Yes | 0 | G0/G0 |
| ANCA-associated glomerulonephritis | No  | 0 | G0/G0 |
| ANCA-associated glomerulonephritis | Yes | 0 | G0/G0 |
| Arterionephrosclerosis             | Yes | 1 | G1/G0 |
| Arterionephrosclerosis             | No  | 0 | G0/G0 |
| Arterionephrosclerosis             | No  | 2 | G1/G1 |
| Myoglobin Cast Nephropathy         | No  | 1 | G0/G2 |
| Myoglobin Cast Nephropathy         | No  | 1 | G1/G0 |

|                                     |     |   |       |
|-------------------------------------|-----|---|-------|
| Myoglobin Cast Nephropathy          | Yes | 0 | G0/G0 |
| Thrombotic Microangiopathy          | Yes | 0 | G0/G0 |
| Lupus Nephritis                     | Yes | 2 | G2/G2 |
| Kappa Light Chain Cast Nephropathy  | No  | 0 | G0/G0 |
| Kappa Light Chain Cast Nephropathy  | No  | 1 | G1/G0 |
| AL Amyloidosis                      | No  | 0 | G0/G0 |
| Cortical Infarct                    | No  | 0 | G0/G0 |
| Acute Interstitial Nephritis        | No  | 2 | G1/G1 |
| Hemoglobin Cast Nephropathy         | Yes | 0 | G0/G0 |
| Cryoglobulinemic Glomerulonephritis | No  | 0 | G0/G0 |
| Sickle Cell Nephropathy             | Yes | 1 | G1/G0 |
| C3 Glomerulonephritis               | No  | 1 | G1/G0 |
| Light Chain Deposition Disease      | Yes | 0 | G0/G0 |

**Supplemental references - conference abstracts:**

- S1. Hale M, Barney EJ, Jean-Claude YD, *et al.* Collapsing FSGS in COVID-19. *ASN Meeting 2020*; **Abstract PO0806**.
- S2. Song R, Thiruvardudsothy S, Hassler J, *et al.* ANCA-Associated Vasculitis Under a COVID-19 Mask. *ASN Meeting 2020*; **Abstract PO0813**.
- S3. Tran THT, Wu M. Renal Biopsy Findings in Patients with COVID-19 Infection. *ASN Meeting 2020*; **Abstract PO0829**.
- S4. Flores Chang BS, Parikh R, Wanchoo R, *et al.* Thrombotic Microangiopathy (TMA) in a Patient with COVID-19. *ASN Meeting 2020*; **Abstract PO0789**.
- S5. Munoz Casablanca NN, Haroon Al Rasheed MR, Hindi J, *et al.* Renal Histopathological Post-Mortem Findings of 17 Patients with COVID-19 in New York City. *ASN Meeting 2020*; **Abstract PO0840**.
- S6. Salvatore S, Borczuk AC, Seshan SV: Renal Pathology of 34 Consecutive COVID Autopsies: A Single-Institution Experience. In *American Society of Nephrology Kidney Week, On-Demand, 2020*
- S7. Alshomrani A *et al.* *A sticky issue: thrombotic phenomena amidst autopsy findings in fatal cases of COVID-19*. United States and Canadian Academy of Pathology Annual Scientific Meeting, 2021.

**Supplemental Figure 1.**

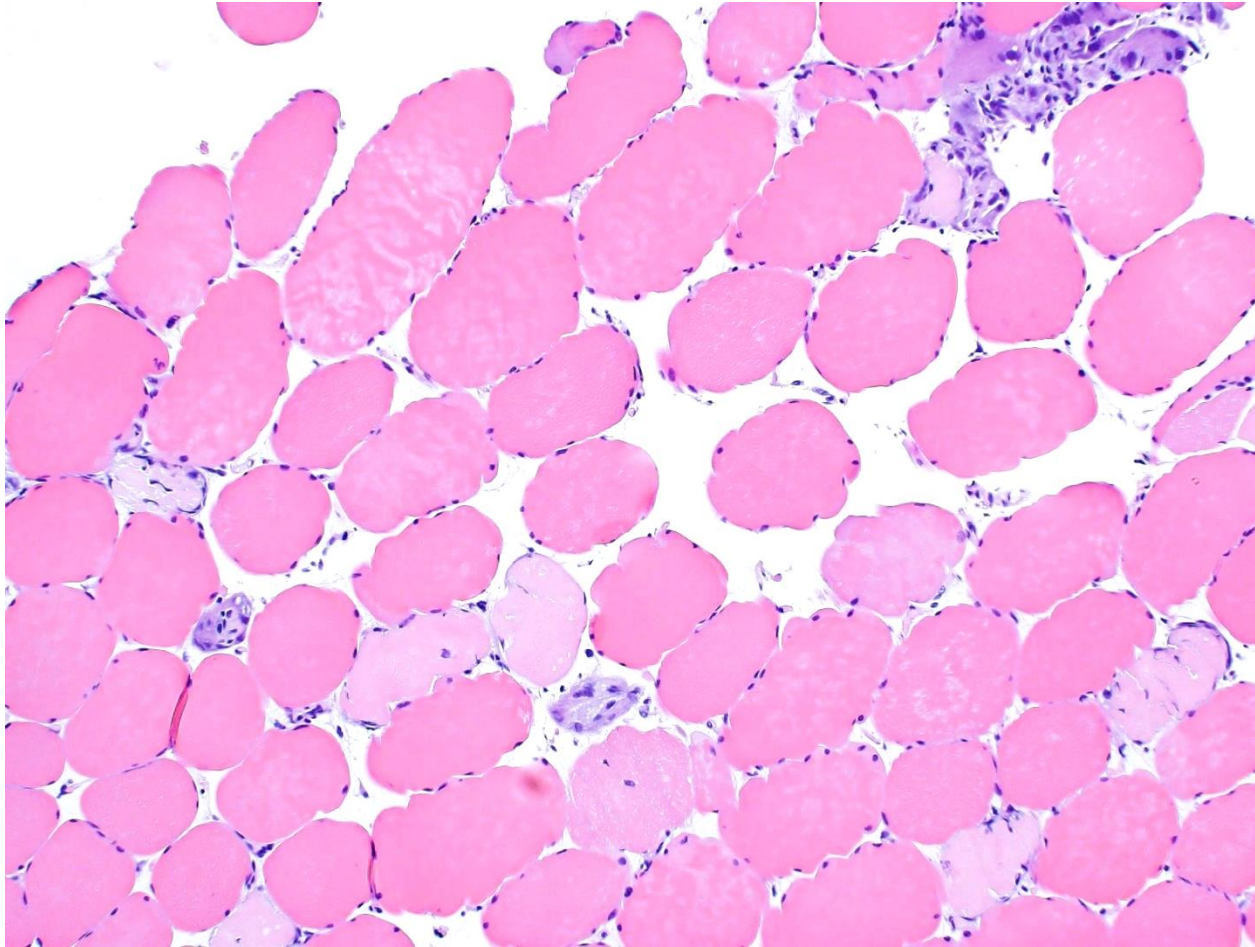

**Supplemental Figure 1:** Scattered pale staining acutely necrotic muscle fibers with only minimal associated chronic lymphoid inflammation (necrotizing myopathy) in a 29-year-old African-American male with myalgias and clinical non-traumatic rhabdomyolysis characterized by marked CPK elevation (~180,000), occurring the week of COVID-19 diagnosis, which did not respond to hydration and supportive care, and required steroid treatment (hematoxylin and eosin; 100x).
